# Supplementary material for: A Methodology for Carbon Footprint Estimations of Research Project Activities—A Scenarios Analysis for Reducing Carbon Footprint
Source: MDPI journal article supplement (doi:10.3390/atmos14010006), 2022-12-20
Supplement: s1 [file s1]

# A Methodology for Carbon Footprint Estimations of Research Project Activities – A Scenarios Analysis for Reducing Carbon Footprint

This supplement provides Tables regarding the activity data used in the methodology of CF.

**Table S1.** Average annual energy use per employee (in kWh/Personyear) for heating purposes.

| Country              | Energy Use (kWh/Personyear) |
|----------------------|-----------------------------|
| Albania              | 1215.8                      |
| Bosnia & Herzegovina | 1215.8                      |
| Croatia              | 822.5                       |
| Cyprus               | 1362.2                      |
| EU                   | 1215.8                      |
| France               | 1255.7                      |
| Greece               | 1085.0                      |
| Italy                | 3137.6                      |
| Malta                | 495.7                       |
| Montenegro           | 1215.8                      |
| Portugal             | 569.6                       |
| Slovenia             | 1376.6                      |
| Spain                | 818.2                       |
| Bulgaria             | 1215.8                      |
| North Macedonia      | 1215.8                      |

**Table S2.** Average annual electricity consumption per employee (in kWh/Personyear) for heating purposes.

| Country              | Electricity Consumption (kWh/Personyear) |
|----------------------|------------------------------------------|
| Albania              | 2823                                     |
| Bosnia & Herzegovina | 2823                                     |
| Croatia              | 5742                                     |
| Cyprus               | 2823                                     |
| EU                   | 2823                                     |
| France               | 4846                                     |
| Greece               | 2823                                     |
| Italy                | 4549                                     |
| Malta                | 3804                                     |
| Montenegro           | 2823                                     |
| Portugal             | 3518                                     |
| Slovenia             | 2823                                     |
| Spain                | 4482                                     |
| Bulgaria             | 2823                                     |
| North Macedonia      | 2823                                     |

**Table S3.** Average annual amount of material used or wasted (glass, food and drink, aluminum cans, plastics, paper) (in tn/PersonYear) per employee in offices.

| Type of Material | Material Used (tn/Personyear) | Material Wasted (tn/Personyear) |
|------------------|-------------------------------|---------------------------------|
| Glass            | 0.006                         | 0.006                           |
| Food and drink   | 0.21                          | 0.042                           |
| Aluminium cans   | 0.006                         | 0.006                           |
| Plastics         | 0.014                         | 0.014                           |
| Paper            | 0.12                          | 0.12                            |

**Table S4.** Percentage distribution (%) of materials wasted by type of disposal per country.

| Country              | Glass     |          | Aluminum Cans |          | Plastics  |          | Paper     |          |
|----------------------|-----------|----------|---------------|----------|-----------|----------|-----------|----------|
|                      | Recycling | Landfill | Recycling     | Landfill | Recycling | Landfill | Recycling | Landfill |
| Albania              | 75.8      | 24.2     | 82.9          | 17.1     | 41.4      | 58.6     | 84.2      | 15.8     |
| Bosnia & Herzegovina | 75.8      | 24.2     | 82.9          | 17.1     | 41.4      | 58.6     | 84.2      | 15.8     |
| Croatia              | 60.5      | 39.5     | 20.5          | 79.5     | 37.3      | 62.7     | 93.7      | 6.3      |
| Cyprus               | 46.3      | 53.7     | 100           | 0.0      | 54.3      | 45.7     | 97.9      | 2.1      |
| EU                   | 75.8      | 24.2     | 82.9          | 17.1     | 41.4      | 58.6     | 84.2      | 15.8     |
| France               | 76.2      | 23.8     | 87.1          | 12.9     | 26.9      | 73.1     | 92.1      | 7.9      |
| Greece               | 32.9      | 67.1     | 71.7          | 28.3     | 39.8      | 60.2     | 91.5      | 8.5      |
| Italy                | 73.4      | 26.6     | 77.6          | 22.4     | 43.4      | 56.6     | 80        | 20.0     |
| Malta                | 41.4      | 58.6     | 68.2          | 31.8     | 11.1      | 88.9     | 48.4      | 51.6     |
| Montenegro           | 75.8      | 24.2     | 82.9          | 17.1     | 41.4      | 58.6     | 84.2      | 15.8     |
| Portugal             | 51.3      | 48.7     | 42.5          | 57.5     | 33.9      | 66.1     | 66.8      | 33.2     |
| Slovenia             | 100       | 0.0      | 64.3          | 35.7     | 48.8      | 51.2     | 81.2      | 18.8     |
| Spain                | 76.8      | 23.2     | 84            | 16.0     | 50.7      | 49.3     | 72.5      | 27.5     |
| Bulgaria             | 75.8      | 24.2     | 82.9          | 17.1     | 41.4      | 58.6     | 84.2      | 15.8     |
| North Macedonia      | 75.8      | 24.2     | 82.9          | 17.1     | 41.4      | 58.6     | 84.2      | 15.8     |

**Table S5.** Percentage distribution (%) of food and drink wasted by type of disposal.

| Country/<br>Type of Disposal | Composting | Anaerobic Digestion | Landfill |
|------------------------------|------------|---------------------|----------|
| Albania                      | 25         | 25                  | 50       |
| Bosnia & Herzegovina         | 3          | 3                   | 94       |
| Croatia                      | 1          | 15                  | 84       |
| Cyprus                       | 2          | 2                   | 96       |
| EU                           | 25         | 25                  | 50       |
| France                       | 25         | 25                  | 50       |
| Greece                       | 7          | 0                   | 93       |
| Italy                        | 38         | 22                  | 40       |
| Malta                        | 25         | 25                  | 50       |
| Montenegro                   | 25         | 25                  | 50       |
| Portugal                     | 4          | 6                   | 90       |
| Slovenia                     | 20         | 60                  | 20       |
| Spain                        | 6          | 2                   | 92       |
| Bulgaria                     | 9          | 9                   | 82       |
| North Macedonia              | 50         | 0                   | 50       |

**Table S6.** Percentage distribution (%) of international/national travels in Europe by transport mode.

| Type of Destination/<br>Travel mode | Car  | Bus | National Rail | International Rail | Ferries | Airplanes | Other |
|-------------------------------------|------|-----|---------------|--------------------|---------|-----------|-------|
| International                       | 19.6 | 3.6 | -             | 8.2                | 1.3     | 65.9      | 1.3   |
| National                            | 57.6 | 3.7 | 27.8          | -                  | 0.7     | 8.3       | 1.8   |

**Table S7.** Percentage distribution of travels by main travel mode (car, motorbike, bus, taxi, national rail, light rail and tram/underground, cycling, walking and other).

| Country              | Car   | Motorbike | Bus   | Taxi | National Rail | Light Rail /Tram/Underground | Cycling | Walking | Other |
|----------------------|-------|-----------|-------|------|---------------|------------------------------|---------|---------|-------|
| Albania              | 66.59 | 1.24      | 10.32 | 0.58 | 5.04          | 4.76                         | 4.38    | 4.85    | 2.24  |
| Bosnia & Herzegovina | 66.59 | 1.24      | 10.32 | 0.58 | 5.04          | 4.76                         | 4.38    | 4.85    | 2.24  |
| Croatia              | 72.94 | 0.09      | 9.88  | 0.36 | 2.75          | 4.96                         | 2.05    | 4.49    | 2.49  |
| Cyprus               | 66.59 | 1.24      | 10.32 | 0.58 | 5.04          | 4.76                         | 4.38    | 4.85    | 2.24  |
| EU                   | 66.59 | 1.24      | 10.32 | 0.58 | 5.04          | 4.76                         | 4.38    | 4.85    | 2.24  |
| France               | 66.59 | 1.24      | 10.32 | 0.58 | 5.04          | 4.76                         | 4.38    | 4.85    | 2.24  |
| Greece               | 60.09 | 7.00      | 11.48 | 1.28 | 0.08          | 12.81                        | 0.46    | 5.77    | 1.03  |
| Italy                | 66.59 | 1.24      | 10.32 | 0.58 | 5.04          | 4.76                         | 4.38    | 4.85    | 2.24  |
| Malta                | 66.59 | 1.24      | 10.32 | 0.58 | 5.04          | 4.76                         | 4.38    | 4.85    | 2.24  |
| Montenegro           | 66.59 | 1.24      | 10.32 | 0.58 | 5.04          | 4.76                         | 4.38    | 4.85    | 2.24  |
| Portugal             | 70.16 | 1.34      | 10.80 | 0.43 | 5.14          | 4.04                         | 0.54    | 5.82    | 1.74  |
| Slovenia             | 80.55 | 0.24      | 6.76  | 0.24 | 1.30          | 0.00                         | 3.31    | 6.46    | 1.13  |
| Spain                | 66.59 | 1.24      | 10.32 | 0.58 | 5.04          | 4.76                         | 4.38    | 4.85    | 2.24  |
| Bulgaria             | 66.59 | 1.24      | 10.32 | 0.58 | 5.04          | 4.76                         | 4.38    | 4.85    | 2.24  |
| North Macedonia      | 66.59 | 1.24      | 10.32 | 0.58 | 5.04          | 4.76                         | 4.38    | 4.85    | 2.24  |
